# Supplementary material for: Sonication-Free Dispersion of Single-Walled Carbon Nanotubes for High-Sorption-Capacity Aerogel Fabrication
Source: MDPI journal article supplement (doi:10.3390/molecules27217657), 2022-11-07
Supplement: s1 [file s1]

# Sonication-Free Dispersion of Single-Walled Carbon Nanotubes for High-Sorption-Capacity Aerogel Fabrication

Dong Li <sup>1</sup>, Liantao Xin <sup>1</sup>, Bocheng Yang <sup>1</sup>, Zizheng Chen <sup>1</sup>, Qianru Wu <sup>1</sup>, Fangqian Han <sup>1</sup>, Shulan Hao <sup>1</sup>, Lihu Feng <sup>1</sup>, Xiaoyu Wang <sup>1</sup>, Shiying Wang <sup>1,\*</sup>, Lei Wang <sup>1,2</sup> and Maoshuai He <sup>1,\*</sup>

<sup>1</sup> College of Chemistry and Molecular Engineering, Qingdao University of Science and Technology, Qingdao 266042, China

<sup>2</sup> Shandong Engineering Research Center for Marine Environment Corrosion and Safety Protection, College of Environment and Safety Engineering, Qingdao University of Science and Technology, Qingdao 266042, China

\* Correspondence: wangshiying@qust.edu.cn (S.W.); hemaoshuai@qust.edu.cn (M.H.); Tel.: +86-53284022681(M.H.)

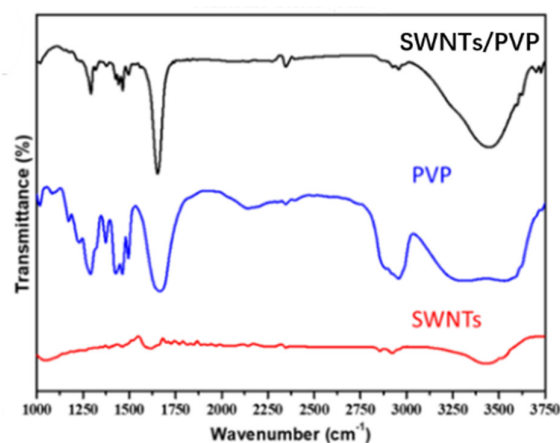

**Figure S1.** Infrared spectra of raw SWNTs, PVP, and SWNT/PVP dispersion.

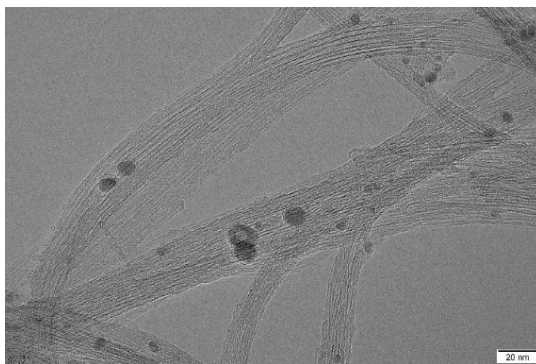

**Figure S2.** TEM image of SWNT aerogels.

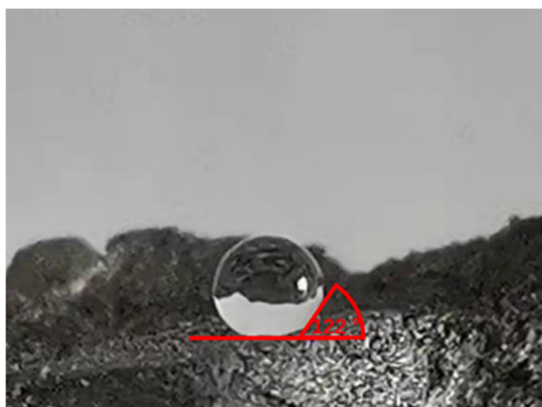

**Figure S3.** A drop of water on SWNT aerogels.
